# Supplementary material for: Repeated activation of preoptic area recipient neurons in posterior paraventricular nucleus mediates chronic heat-induced negative emotional valence and hyperarousal states
Source: eLife. 2025 Apr 9;13:RP101302. doi: 10.7554/eLife.101302 (PMC11981607; doi:10.7554/eLife.101302)
Supplement: Source data 1. [file elife-101302-data1.xlsx]

## Sheet: Fig.1C
Fig.1C Time in open arms (s)
Control	Chronic heat
141.7	53.4
135.6	37.6
123.2	17.8
138.7	48.1
169	31.6
121.2	31.3
142.3	50.5
174.2	29
168.5	82.8
158.9	56.6

## Sheet: Fig.1E
Fig.1E Time ratio (male / object)
Control	Chronic heat
1.26164	1.08463
2.60341	1.11039
1.47095	1.05169
1.48959	1.12761
2.08979	1.11657
2.21128	1.18663
1.80182	1.38877
1.31503	0.864662
1.64792	2.44234
2.2519	1.36403

## Sheet: Fig.1G
Fig.1G Time ratio (female / male)
Control	Chronic heat
2.82136	1.58516
3.40021	1.39798
6.5566	1.59974
3.27105	0.515559
4.35941	1.05971
2.83475	1.47548
5.39691	2.60209
2.31313	1.23054
1.53168	2.87124
2.28436	1.44164

## Sheet: Fig. 1H
Fig.1H 1st attack latency (s)
Control	Chronic heat
432	188
257	268
431	88
331	129
169	239
354	209
86.797	91
243.402	38
163.388	54
175.339	61

## Sheet: Fig.1I
Fig.1I Attack durations (s)
Control	Chronic heat
5	74
87	112
59	173
13	221
31	206
19	270
162.704	169
156	49
144	73
126	134

## Sheet: Fig.1L
Fig.1L Startle amplitude
Control	Chronic heat
5.08309	16.5063
5.03723	13.2985
2.64047	9.27716
3.86443	9.5798
6.04158	11.6095
6.11868	11.1056
7.97324	13.6097
10.9234	22.4943
8.23521	10.3456
11.0121	11.8291

## Sheet: Fig.1M
Fig.1M Pre-pulse / pulse ratio
Control	Chronic heat
0.731329	0.673661
0.600348	0.947101
1.17271	1.61573
1.24023	1.96868
0.359158	0.86475
0.517559	0.686631
0.4566	0.820494
0.323352	0.454817
0.5678	0.7978
0.7893	0.97623

## Sheet: Fig.1N
Fig.1N Immobile time (s)
Control	Chronic heat
176.4	215.9
113.3	211.1
238.2	225.9
166.5	212
180.9	202.1
200	203.2
158.9	115
131.2	104
120.9	174.6
138.8	147.5

## Sheet: Fig.1O
Fig.1O Immobile time (s)
Control	Chronic heat
338.4	194.4
289.6	298.5
307.7	213.6
352.9	175.6
242.9	169.9
214.5	247.9
336.1	191.2
215	231.1
188.9	174.8
183	262.7

## Sheet: Fig.1P
Fig.1P Sucrose intake (%)
Control	Chronic heat
93	84.9906
94	94.5946
89.1304	91.6667
66.6667	68.75
97.8261	91.67
98	93.75
85.7143	83.3333
77.2727	71.4286
94.4444	76.1905
87.5	94.4444

[truncated: 82 more sheets: Fig.1Q, Fig.2H, Fig.2K, Fig.3D, Fig.3E, Fig.3F, Fig.3G, Fig.3H, Fig.4C, Fig.4E, Fig.4G, Fig.4H, Fig.4I, Fig.4L, Fig.4M, Fig.4P, Fig.4Q, Fig.4R, Fig.4S, Fig.4T …]
